# Supplementary material for: Revision of the Genus <em>Sycanus</em> Amyot & Serville, 1843 (Heteroptera: Reduviidae: Harpactorinae) from China Based on DNA Barcoding and Morphological Evidence
Source: Preprints.org preprint supplement (doi:10.20944/preprints202308.1674.v3), 2023-09-05
Supplement: Supplementary file 1 [file supplementary]

# Revision of the genus *Sycanus* Amyot & Serville, 1843 (Heteroptera: Reduviidae: Harpactorinae) from China based on DNA barcoding and morphological evidence

Ping Zhao <sup>1</sup>, Suyi Chen <sup>2,3</sup>, Jianyun Wang <sup>4</sup>, Zhuo Chen <sup>2,3</sup>, Hu Li <sup>2,3</sup> and Wanzhi Cai <sup>2,3\*</sup>

<sup>1</sup> Key Laboratory of Environment Change and Resources Use in Beibu Gulf (Ministry of Education) and Guangxi Key Laboratory of Earth Surface Processes and Intelligent Simulation, Nanning Normal University, Nanning 530001, China; Ping Zhao [zpyajl@126.com]

<sup>2</sup> Department of Entomology and MOA Key Lab of Pest Monitoring and Green Management, College of Plant Protection, China Agricultural University, Beijing 100193, China; Suyi Chen [chensuyiii@163.com]; Zhuo Chen [insectchen625@126.com]; Hu Li [tigerleecau@hotmail.com]; Wanzhi Cai [caiwx@cau.edu.cn]

<sup>3</sup> Sanya Institute of China Agricultural University, Sanya 572025, China;

<sup>4</sup> Environment and Plant Protection Institute, Chinese Academy of Tropical Agricultural Sciences, Haikou, Hainan 571101, China; Jianyun Wang [wjy-1989@163.com]

\* Correspondence: [caiwx@cau.edu.cn](mailto:caiwx@cau.edu.cn); Tel.: +0086-010-62732885.

<https://zoobank.org/References/6412AE5B-755B-41B6-AC59-4D0AE0E09904>

**Figure S1.** The maximum likelihood (ML) tree of cytochrome c oxidase subunit I (COI) sequences for 81 terminals of *Sycanus*. The numbers above the branches are bootstrap values. The clades / species identified in this study are indicated in different colors.

**Figure S2.** The neighbor-joining (NJ) tree of cytochrome c oxidase subunit I (COI) sequences for 81 terminals of *Sycanus*. The numbers above the branches are bootstrap values. The clades / species identified in this study are indicated in different colors.

**Figure S3.** The neighbor-joining (NJ) tree of partial 28S rDNA sequences for 34 terminals of *Sycanus*. The numbers above the branches are bootstrap values.

**Figure S4.** *Sycanus bicolor* Hsiao, 1979, **Paratype**, habitus, female. (a), dorsal view; (b), lateral view; (c), ventral view. Scale bar (a–c) = 2.86 mm.

**Figure S5.** *Sycanus croceus* Hsiao, 1979, habitus, (a–c), male, (d–f), female. (a, d), dorsal view; (b, e), lateral view; (c, f), ventral view. Scale bar of (a–f) = 10.00 mm.

**Figure S6.** *Sycanus falleni* Stål, 1863, (a, b), **type species** (kept in Swedish Museum of Natural History), female, habitus; (c–e), male, habitus; (f–h), female, habitus. (a, c, f), dorsal view; (b, d, g), ventral view; (d, g), lateral view. Scale bar of (c–h) = 7.06 mm, (f–h) = 7.84 mm.

**Figure S7.** (a, b), *Sycanus generosus* Stål, 1863, **type species** (kept in Swedish Museum of Natural History), female, habitus; (c–e) *Sycanus marginatus* Hsiao, 1979, **Holotype**, female, habitus. (a, c) dorsal view; (d) lateral view; (b, e) ventral view. Scale bar of (c–e) = 5.38 mm.

**Figure S8.** (a, b) *Sycanus croceovittatus* (Dohrn, 1859); (c, b) *Sycanus falleni* Stål, 1863; (e) *Sycanus minor* Hsiao, 1979; (f) *Sycanus sichuanensis* Hsiao, 1979.

**Table S1.** GenBank Accession number under every sample individual code.

**Table S2.** Pairwise genetic divergence (Kimura two-parameter) within and between 12 sampling species of the genus *Sycanus* using cytochrome c oxidase subunit I gene sequence (Table S2 is uploaded separately)

**Table S3.** Pairwise genetic divergence (Kimura two-parameter) between 81 individuals of 12 species of the genus *Sycanus* using cytochrome c oxidase subunit I gene sequence (Table S3 is uploaded separately)

**Table S4.** Life history of *Sycanus croceus* Hsiao, 1979 (China, Guangxi, Ningming)

**Table S5.** Life history of *Sycanus falleni* Stål, 1863 (China, Guangxi, Ningming)

**Alignment S1.** Alignment of COI DNA barcodes dataset (Alignment S1 is uploaded separately)

**Alignment S2.** Alignment of partial 28S rDNA sequences dataset (Alignment S2 is uploaded separately)



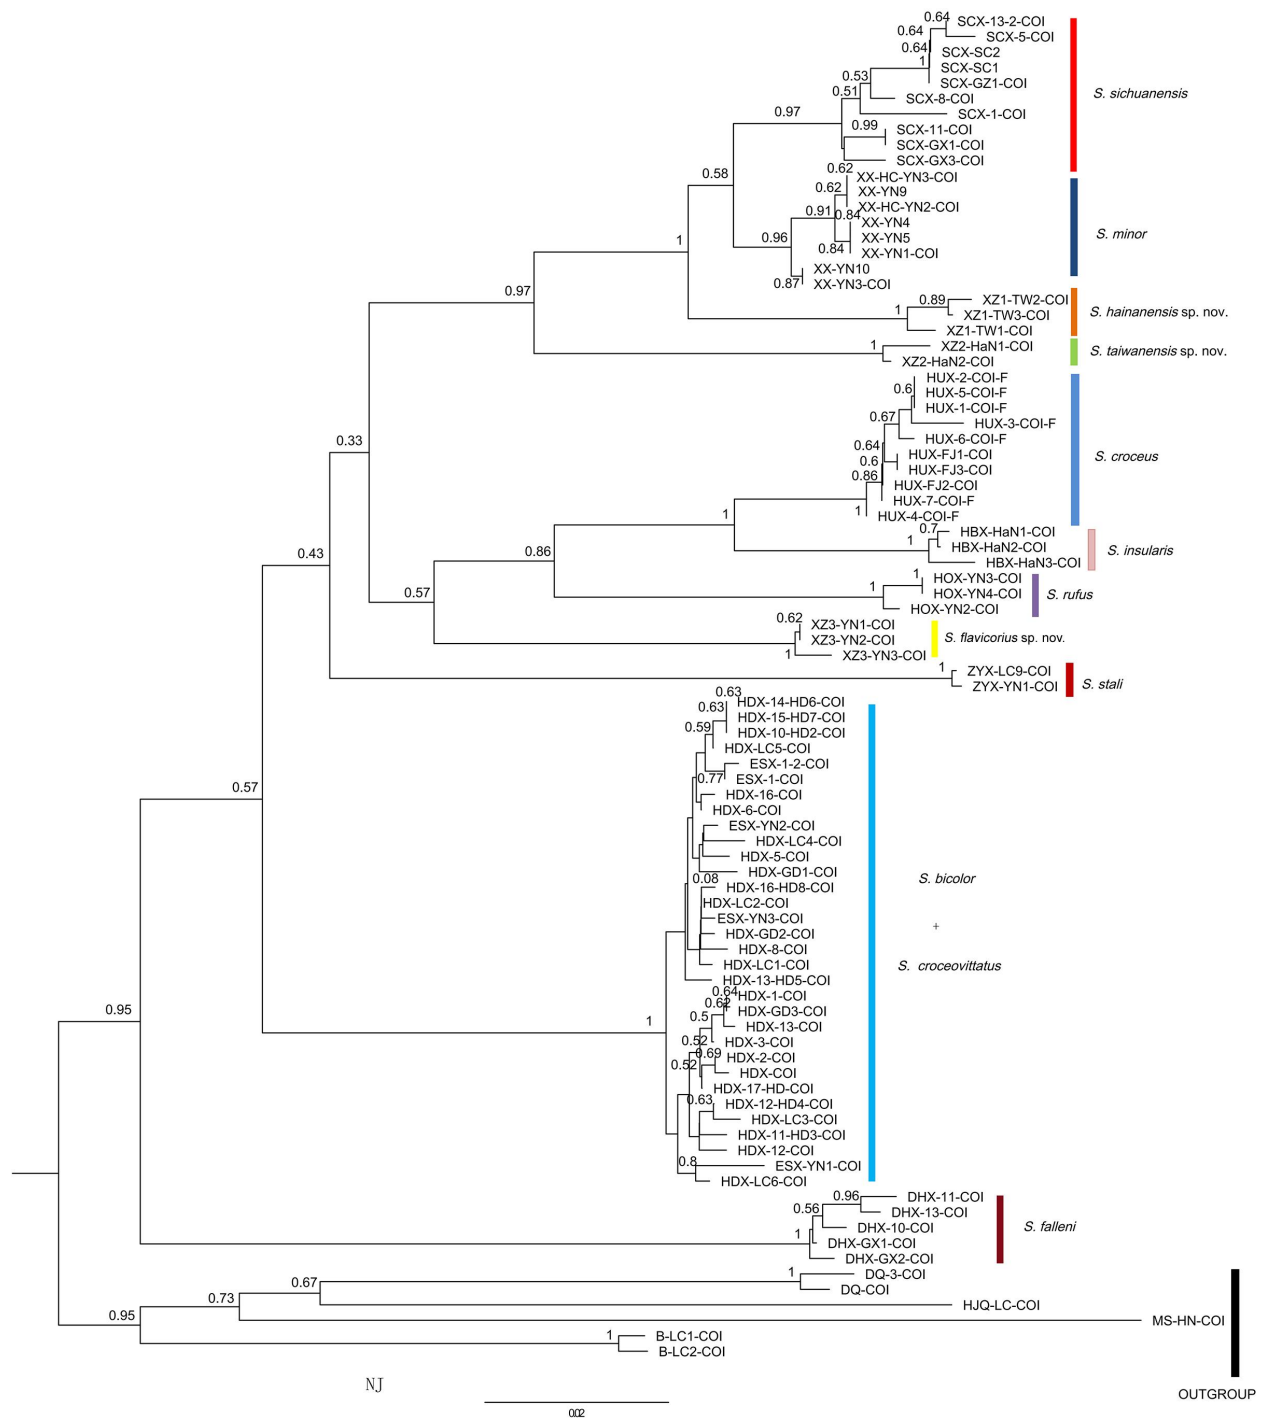

**Figure S2.** The neighbor-joining (NJ) tree of cytochrome c oxidase subunit I (COI) sequences for 81 terminals of *Sycaenus*. The numbers above the branches are bootstrap values. The clades / species identified in this study are indicated in different colors.

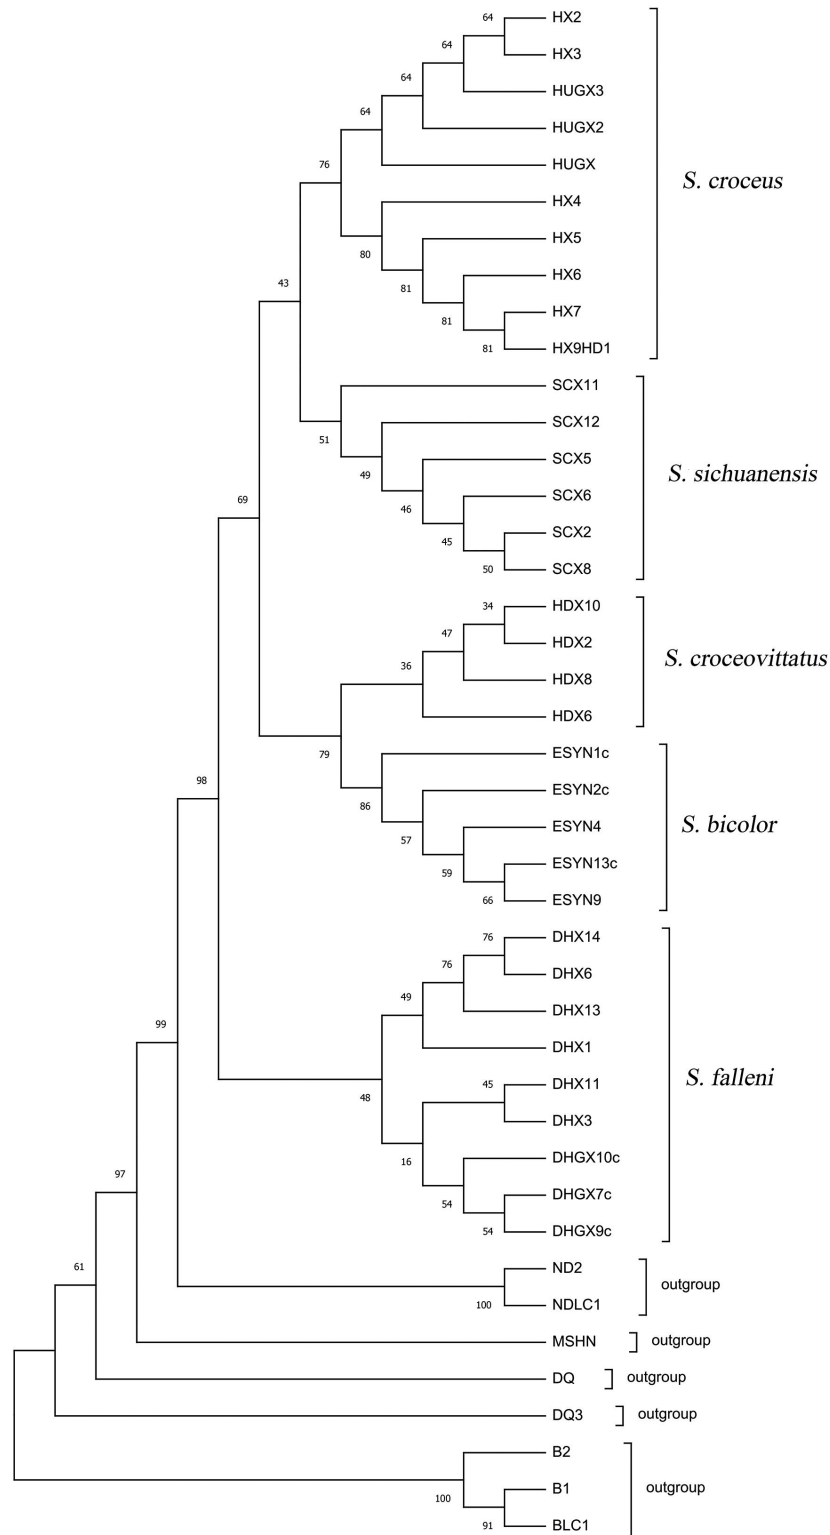

**Figure S3.** The neighbor-joining (NJ) tree of partial 28S rDNA sequences for 34 terminals of *Sycaeanus*. The numbers above the branches are bootstrap values.

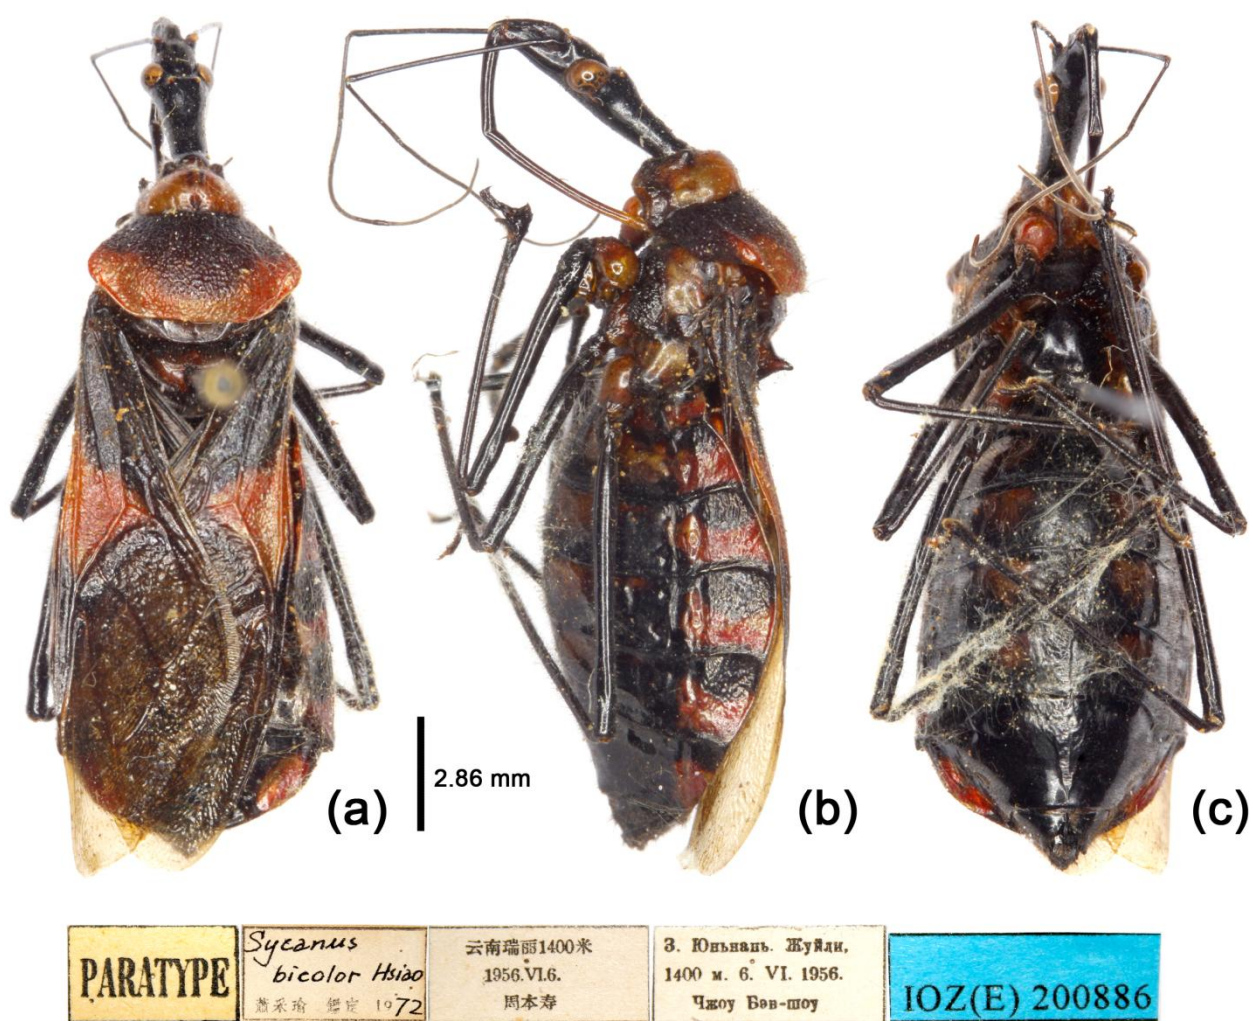

**Figure S4.** *Sycanus bicolor* Hsiao, 1979, **Paratype**, habitus, female. (a), dorsal view; (b), lateral view; (c), ventral view. Scale bar (a-c) = 2.86 mm.

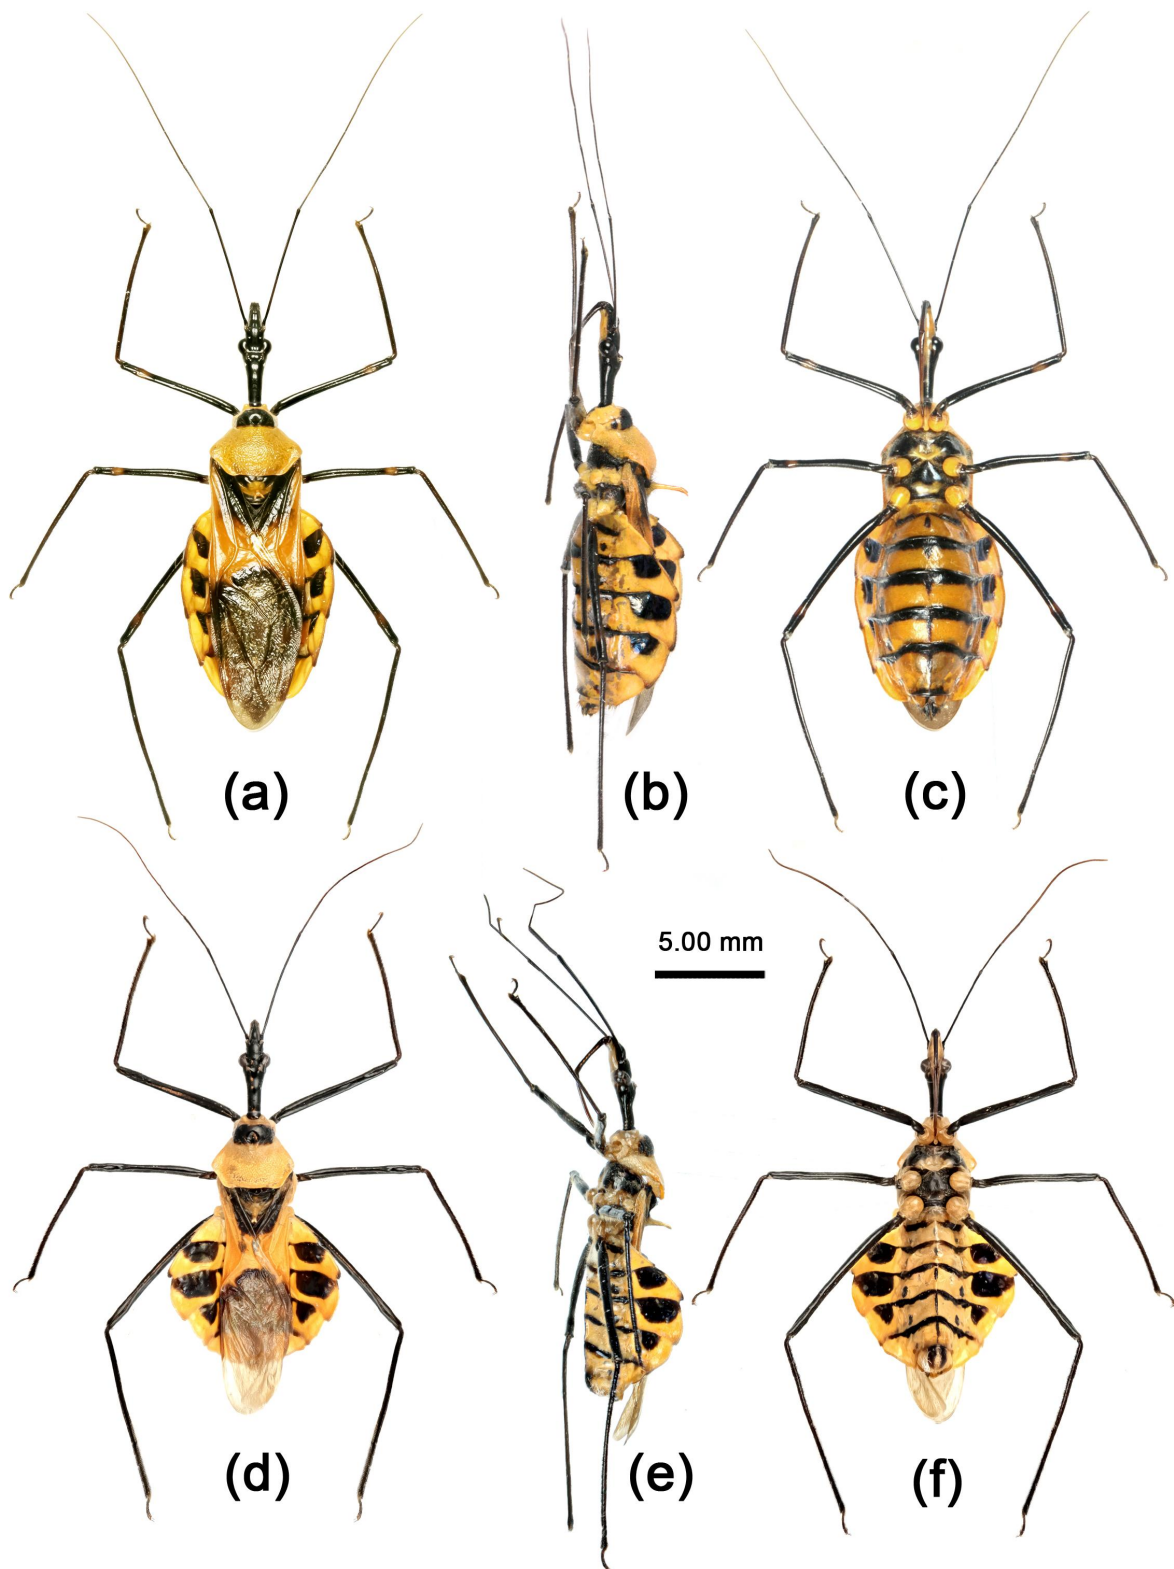

**Figure S5.** *Sycanus croceus* Hsiao, 1979, habitus, (a–c), male, (d–f), female. (a, d), dorsal view; (b, e), lateral view; (c, f), ventral view. Scale bar of (a–f)= 5.00 mm.

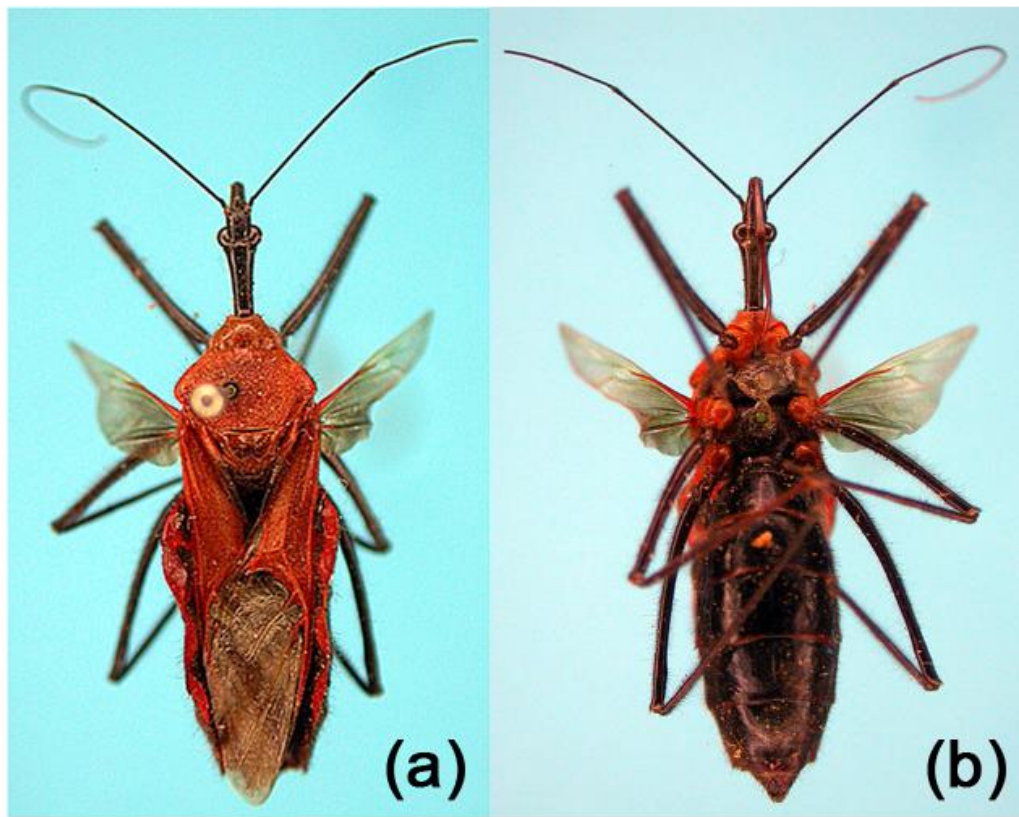

**Figure S6.** *Sycanus falleni* Stål, 1863, (a, b), **type species** (kept in Swedish Museum of Natural History), female, habitus.

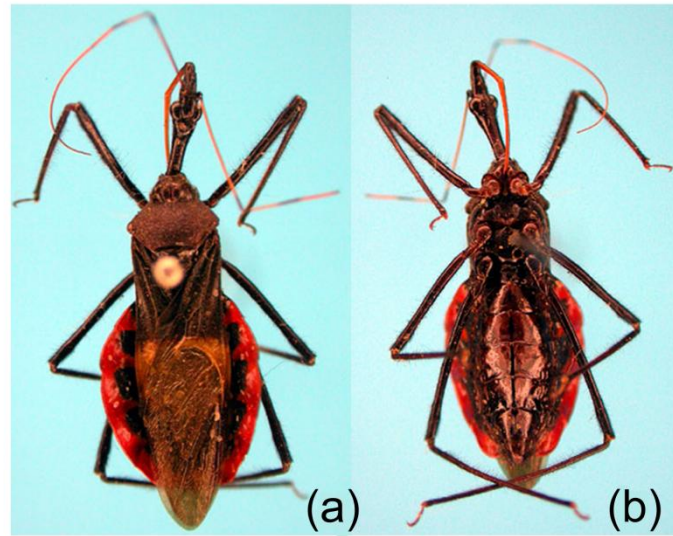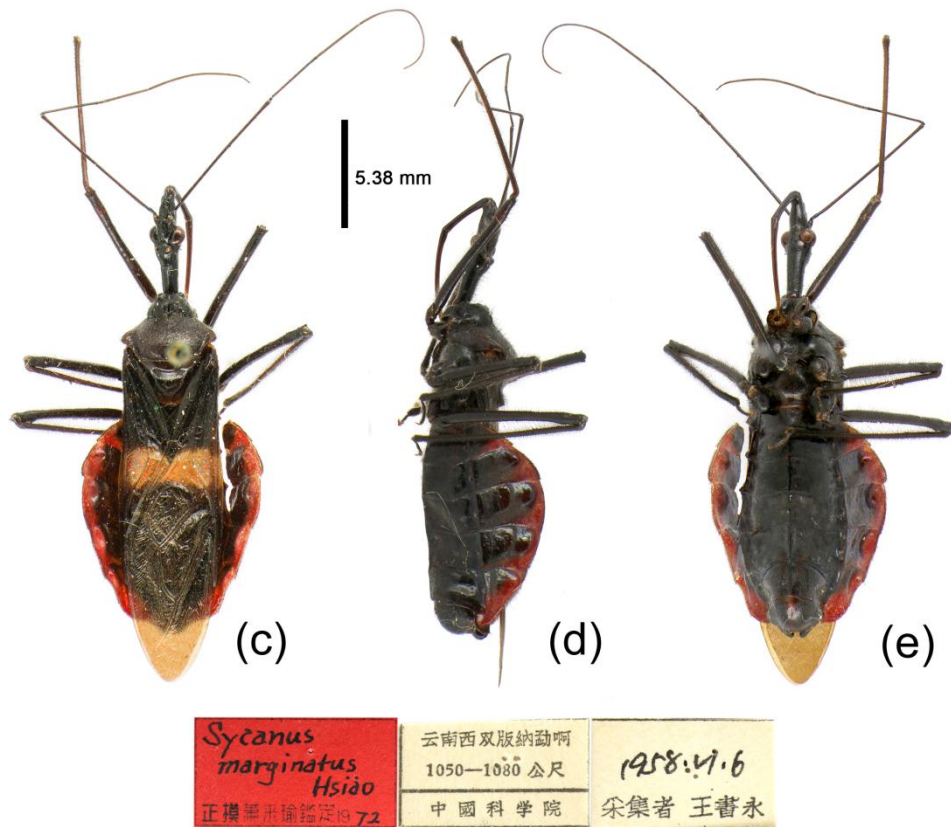

**Figure S7.** (a, b), *Sycanus generosus* Stål, 1863, **type species** (kept in Swedish Museum of Natural History), female, habitus; (c-e) *Sycanus marginatus* Hsiao, 1979, **Holotype** (kept in Institut of Zoology, Chinese Academy of Sciences, Beijing, China), female, habitus. (a, c) dorsal view; (d) lateral view; (b, e) ventral view. Scale bar of (c-e)= 5.38 mm.

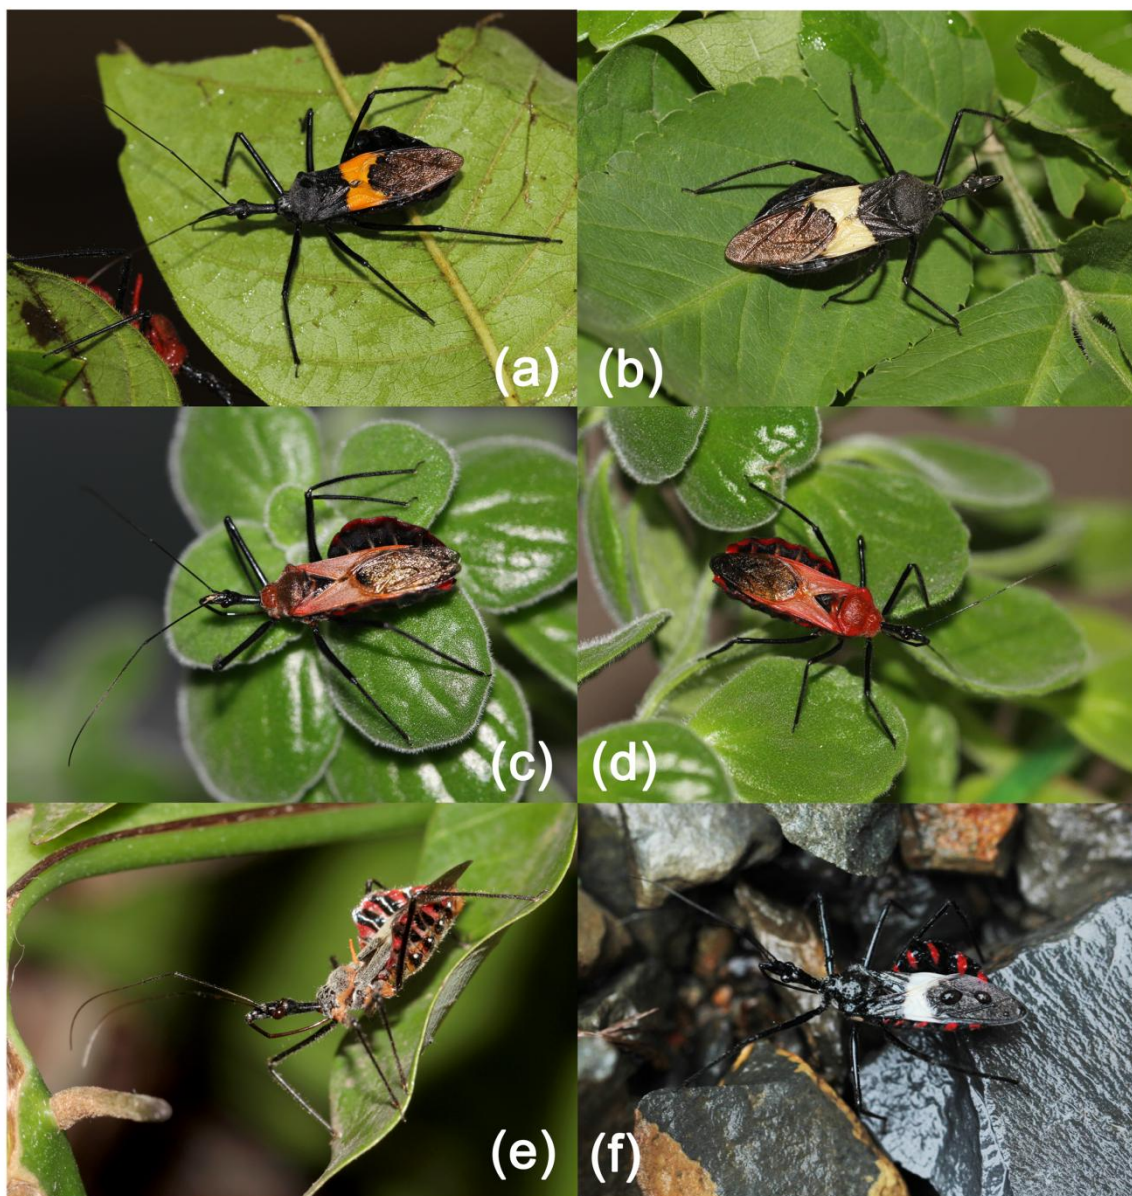

**Figure S8.** (a, b) *Sycanus croceovittatus* (Dohrn, 1859); (c, b) *Sycanus falleni* Stål, 1863; (e) *Sycanus minor* Hsiao, 1979; (f) *Sycanus sichuanensis* Hsiao, 1979.

**Table S1.** GenBank Accession number under every sample individual code (in PDF file of Supporting information)

| COI DNA barcodes |                |                          |     |               |                          |
|------------------|----------------|--------------------------|-----|---------------|--------------------------|
| No.              | Sample code    | GenBank Accession number | No. | Sample code   | GenBank Accession number |
| 1*               | MS-HN-COI      | OP927069                 | 44  | HDX-LC5-COI   | OP927112                 |
| 2*               | B-LC1-COI      | OP927070                 | 45  | HDX-LC6-COI   | OP927113                 |
| 3*               | DQ-3-COI       | OP927071                 | 46  | HOX-YN2-COI   | OP927114                 |
| 4*               | DQ-COI         | OP927072                 | 47  | HOX-YN3-COI   | OP927115                 |
| 5*               | B-LC2-COI      | OP927073                 | 48  | HOX-YN4-COI   | OP927116                 |
| 6                | DHX-10-COI     | OP927074                 | 49  | HUX-1-COI-F   | OP927117                 |
| 7                | DHX-11-COI     | OP927075                 | 50  | HUX-2-COI-F   | OP927118                 |
| 8                | DHX-13-COI     | OP927076                 | 51  | HUX-3-COI-F   | OP927119                 |
| 9                | DHX-GX1-COI    | OP927077                 | 52  | HUX-4-COI-F   | OP927120                 |
| 10               | DHX-GX2-COI    | OP927078                 | 53  | HUX-5-COI-F   | OP927121                 |
| 11               | ESX-1-2-COI    | OP927079                 | 54  | HUX-6-COI-F   | OP927122                 |
| 12               | ESX-1-COI      | OP927080                 | 55  | HUX-7-COI-F   | OP927123                 |
| 13               | ESX-YN1-COI    | OP927081                 | 56  | HUX-FJ1-COI   | OP927124                 |
| 14               | ESX-YN2-COI    | OP927082                 | 57  | HUX-FJ2-COI   | OP927125                 |
| 15               | ESX-YN3-COI    | OP927083                 | 58  | HUX-FJ3-COI   | OP927126                 |
| 16               | HBX-HaN1-COI   | OP927084                 | 59  | SCX-11-COI    | OP927127                 |
| 17               | HBX-HaN2-COI   | OP927085                 | 60  | SCX-13-2-COI  | OP927128                 |
| 18               | HBX-HaN3-COI   | OP927086                 | 61  | SCX-1-COI     | OP927129                 |
| 19               | HDX-10-HD2-COI | OP927087                 | 62  | SCX-5-COI     | OP927130                 |
| 20               | HDX-11-HD3-COI | OP927088                 | 63  | SCX-8-COI     | OP927131                 |
| 21               | HDX-12-COI     | OP927089                 | 64  | SCX-GX1-COI   | OP927132                 |
| 22               | HDX-12-HD4-COI | OP927090                 | 65  | SCX-GX3-COI   | OP927133                 |
| 23               | HDX-13-COI     | OP927091                 | 66  | SCX-GZ1-COI   | OP927134                 |
| 24               | HDX-13-HD5-COI | OP927092                 | 67  | SCX-SC1       | OP927135                 |
| 25               | HDX-14-HD6-COI | OP927093                 | 68  | SCX-SC2       | OP927136                 |
| 26               | HDX-15-HD7-COI | OP927094                 | 69  | XX-HC-YN2-COI | OP927137                 |
| 27               | HDX-16-COI     | OP927095                 | 70  | XX-HC-YN3-COI | OP927138                 |
| 28               | HDX-16-HD8-COI | OP927096                 | 71  | XX-YN10       | OP927139                 |
| 29               | HDX-17-HD-COI  | OP927097                 | 72  | XX-YN1-COI    | OP927140                 |
| 30               | HDX-1-COI      | OP927098                 | 73  | XX-YN3-COI    | OP927141                 |
| 31               | HDX-2-COI      | OP927099                 | 74  | XX-YN4        | OP927142                 |
| 32               | HDX-3-COI      | OP927100                 | 75  | XX-YN5        | OP927143                 |
| 33               | HDX-5-COI      | OP927101                 | 76  | XX-YN9        | OP927144                 |
| 34               | HDX-6-COI      | OP927102                 | 77  | XZ1-TW1-COI   | OP927145                 |
| 35               | HDX-8-COI      | OP927103                 | 78  | XZ1-TW2-COI   | OP927146                 |
| 36               | HDX-COI        | OP927104                 | 79  | XZ1-TW3-COI   | OP927147                 |
| 37               | HDX-GD1-COI    | OP927105                 | 80  | XZ2-HaN1-COI  | OP927148                 |
| 38               | HDX-GD2-COI    | OP927106                 | 81  | XZ2-HaN2-COI  | OP927149                 |
| 39               | HDX-GD3-COI    | OP927107                 | 82  | XZ3-YN1-COI   | OP927150                 |
| 40               | HDX-LC1-COI    | OP927108                 | 83  | XZ3-YN2-COI   | OP927151                 |

|    |             |          |     |             |               |
|----|-------------|----------|-----|-------------|---------------|
| 41 | HDX-LC2-COI | OP927109 | 84  | XZ3-YN3-COI | OP927152      |
| 42 | HDX-LC3-COI | OP927110 | 85  | ZYX-LC9-COI | OP927153      |
| 43 | HDX-LC4-COI | OP927111 | 86  | ZYX-YN1-COI | OP927154      |
|    |             |          | 87* | HJQ-LC-COI  | not submitted |

#### Partial 28S rDNA sequence

| No. | Sample code | GenBank<br>number | Accession | No. | Sample code | GenBank Accession number |
|-----|-------------|-------------------|-----------|-----|-------------|--------------------------|
| 1*  | B1          | OP923231          |           | 22  | HDX6        | OP923252                 |
| 2*  | B2          | OP923232          |           | 23  | HDX8        | OP923253                 |
| 3*  | BLC1        | OP923233          |           | 24  | HUGX        | OP923254                 |
| 4   | DHGX10c     | OP923234          |           | 25  | HUGX2       | OP923255                 |
| 5   | DHGX7c      | OP923235          |           | 26  | HUGX3       | OP923256                 |
| 6   | DHGX9c      | OP923236          |           | 27  | HX2         | OP923257                 |
| 7   | DHX1        | OP923237          |           | 28  | HX3         | OP923258                 |
| 8   | DHX11       | OP923238          |           | 29  | HX4         | OP923259                 |
| 9   | DHX13       | OP923239          |           | 30  | HX5         | OP923260                 |
| 10  | DHX14       | OP923240          |           | 31  | HX6         | OP923261                 |
| 11  | DHX3        | OP923241          |           | 32  | HX7         | OP923262                 |
| 12  | DHX6        | OP923242          |           | 33  | HX9HD1      | OP923263                 |
| 13* | DQ          | OP923243          |           | 34* | MSHN        | OP923264                 |
| 14* | DQ3         | OP923244          |           | 35* | ND2         | OP923265                 |
| 15  | ESYN13c     | OP923245          |           | 36  | NDLC1       | OP923266                 |
| 16  | ESYN1c      | OP923246          |           | 37  | SCX11       | OP923267                 |
| 17  | ESYN2c      | OP923247          |           | 38  | SCX12       | OP923268                 |
| 18  | ESYN4       | OP923248          |           | 39  | SCX2        | OP923269                 |
| 19  | ESYN9       | OP923249          |           | 40  | SCX5        | OP923270                 |
| 20  | HDX10       | OP923250          |           | 41  | SCX6        | OP923271                 |
| 21  | HDX2        | OP923251          |           | 42  | SCX8        | OP923272                 |

**Note.** The outgroups are marked with an asterisk in the serial number.

**Table S4. Life history of *Sycanus croceus* Hsiao, 1979 (China, Guangxi, Ningming)**

|                  | January |     |     | February |     |     | March |     |     | April |     |     | May |   |   | June |   |   | July |   |   | August |   |   | September |   |   | October |     |     | November |     |     | December |  |  |
|------------------|---------|-----|-----|----------|-----|-----|-------|-----|-----|-------|-----|-----|-----|---|---|------|---|---|------|---|---|--------|---|---|-----------|---|---|---------|-----|-----|----------|-----|-----|----------|--|--|
|                  | A       | B   | C   | A        | B   | C   | A     | B   | C   | A     | B   | C   | A   | B | C | A    | B | C | A    | B | C | A      | B | C | A         | B | C | A       | B   | C   | A        | B   | C   |          |  |  |
| Egg              |         |     |     |          |     |     |       |     |     |       |     |     |     |   | 0 | 0    | 0 | 0 | 0    | 0 | 0 | 0      |   |   |           |   |   |         |     |     |          |     |     |          |  |  |
| 1st instar nymph |         |     |     |          |     |     |       |     |     |       |     |     |     |   | 1 | 1    | 1 | 1 | 1    | 1 | 1 | 1      | 1 |   |           |   |   |         |     |     |          |     |     |          |  |  |
| 2nd instar nymph |         |     |     |          |     |     |       |     |     |       |     |     |     |   |   | 2    | 2 | 2 | 2    | 2 | 2 | 2      | 2 | 2 |           |   |   |         |     |     |          |     |     |          |  |  |
| 3rd instar nymph |         |     |     |          |     |     |       |     |     |       |     |     |     |   |   |      |   |   |      |   | 3 | 3      | 3 | 3 | 3         | 3 | 3 | 3       |     |     |          |     |     |          |  |  |
| 4th instar nymph |         |     |     |          |     |     |       |     |     |       |     |     |     |   |   |      |   |   |      |   |   |        |   | 4 | 4         | 4 | 4 | 4       | 4   | 4   | 4        |     |     |          |  |  |
| 5th instar nymph |         |     |     |          |     |     |       |     |     |       |     |     |     |   |   |      |   |   |      |   |   |        |   |   |           |   | 5 | 5       | 5   | 5   | 5        | 5   | 5   |          |  |  |
| Adult            | (+)     | (+) | (+) | (+)      | (+) | (+) | (+)   | (+) | (+) | (+)   | (+) | (+) | +   | + | + | +    | + | + | +    | + | + | +      |   |   |           | + | + | +       | (+) | (+) | (+)      | (+) | (+) |          |  |  |

†A: the first 10 days of month; B: the middle 10 days of month; C: the last 10 days of month. ‡ “0”: egg; “1” : 1st instar nymph; “2” : 2nd instar nymph; “3” : 3rd instar nymph; “4”: 4th instar of nymph; “5”: 5th instar of nymph. §“(+)”: overwinter adult; “+”: adult.

**Table S5. Life history of *Sycanus falleni* Stål, 1863 (China, Guangxi, Ningming)**

|                  | January |     |     | February |     |     | March |     |     | April |     |     | May |   |   | June |   |   | July |   |   | August |   |   | September |   |   | October |   |   | November |     |     | December |   |  |
|------------------|---------|-----|-----|----------|-----|-----|-------|-----|-----|-------|-----|-----|-----|---|---|------|---|---|------|---|---|--------|---|---|-----------|---|---|---------|---|---|----------|-----|-----|----------|---|--|
|                  | A       | B   | C   | A        | B   | C   | A     | B   | C   | A     | B   | C   | A   | B | C | A    | B | C | A    | B | C | A      | B | C | A         | B | C | A       | B | C | A        | B   | C   |          |   |  |
| Egg              |         |     |     |          |     |     |       |     |     |       |     |     |     |   |   | 0    | 0 | 0 | 0    | 0 | 0 | 0      | 0 | 0 | 0         |   |   |         |   |   |          |     |     |          |   |  |
| 1st instar nymph |         |     |     |          |     |     |       |     |     |       |     |     |     |   |   | 1    | 1 | 1 | 1    | 1 | 1 | 1      | 1 | 1 | 1         |   |   |         |   |   |          |     |     |          |   |  |
| 2nd instar nymph |         |     |     |          |     |     |       |     |     |       |     |     |     |   |   | 2    | 2 | 2 | 2    | 2 | 2 | 2      | 2 | 2 | 2         | 2 |   |         |   |   |          |     |     |          |   |  |
| 3rd instar nymph |         |     |     |          |     |     |       |     |     |       |     |     |     |   |   |      |   |   | 3    | 3 | 3 | 3      | 3 | 3 | 3         | 3 | 3 |         |   |   |          |     |     |          |   |  |
| 4th instar nymph |         |     |     |          |     |     |       |     |     |       |     |     |     |   |   |      |   |   |      |   |   |        | 4 | 4 | 4         | 4 | 4 | 4       | 4 | 4 | 4        |     |     |          |   |  |
| 5th instar nymph |         |     |     |          |     |     |       |     |     |       |     |     |     |   |   |      |   |   |      |   |   |        |   |   |           |   | 5 | 5       | 5 | 5 | 5        | 5   | 5   | 5        | 5 |  |
| Adult            | (+)     | (+) | (+) | (+)      | (+) | (+) | (+)   | (+) | (+) | (+)   | (+) | (+) | (+) | + | + | +    | + | + | +    | + | + | +      | + | + | +         |   |   |         |   |   |          | (+) | (+) | (+)      |   |  |

†A: the first 10 days of month; B: the middle 10 days of month; C: the last 10 days of month. ‡ “0”: egg; “1” : 1st instar nymph; “2” : 2nd instar nymph; “3” : 3rd instar nymph; “4”: 4th instar of nymph; “5”: 5th instar of nymph. §“(+)”: overwinter adult; “+”: adult.
